# Supplementary material for: The Palliative Treatment Plan as a Bone of Contention between Attending Physicians and Nurses
Source: MDPI journal article supplement (doi:10.3390/healthcare3040987), 2015-10-16
Supplement: s1 [file s1]

## Supplemental Materials

**Table S1.** Plan for crisis and emergency management—Palliative Treatment Plan (to be completed by family doctor and attachment nurse).

|                                                                                                              |                                                                                                                                         |
|--------------------------------------------------------------------------------------------------------------|-----------------------------------------------------------------------------------------------------------------------------------------|
| <b>Name:</b>                                                                                                 | <b>Date of birth:</b>                                                                                                                   |
| Medical Background                                                                                           |                                                                                                                                         |
| Chief diagnosis and relevant secondary findings                                                              |                                                                                                                                         |
| Medical improvement is not to be anticipated. The current situation demands predominant palliative treatment |                                                                                                                                         |
| Cardiopulmonary resuscitation is not advised                                                                 | <input type="checkbox"/> Appropriate<br><input type="checkbox"/> Not appropriate                                                        |
| Hospitalization is to be avoided if possible                                                                 | <input type="checkbox"/> Appropriate<br><input type="checkbox"/> Not appropriate                                                        |
| <b>Background of Decision</b>                                                                                |                                                                                                                                         |
| Ability to decide and to judge is present                                                                    | <input type="checkbox"/> Yes<br><input type="checkbox"/> Impaired<br><input type="checkbox"/> Diminished<br><input type="checkbox"/> No |
| Patient will is on hand                                                                                      | <input type="checkbox"/> Yes<br><input type="checkbox"/> no                                                                             |
| Authority to proxy is given                                                                                  | <input type="checkbox"/> Yes<br><input type="checkbox"/> no                                                                             |
| Solicitor is announced                                                                                       | <input type="checkbox"/> Yes<br><input type="checkbox"/> no                                                                             |
| Refused medical treatment by patient<br>(presumed patient will)                                              | <input type="checkbox"/> Yes<br><input type="checkbox"/> no                                                                             |
| <b>Comments:</b>                                                                                             |                                                                                                                                         |
| Relatives are informed about the current situation                                                           | <input type="checkbox"/> Yes<br><input type="checkbox"/> no                                                                             |
| <b>Comments:</b>                                                                                             |                                                                                                                                         |

**Table S2.** Symptomatic Treatment Plan (*Adapted to the individual patient*).

| Indication                                              | Medication/Treatment | Dose Mode of Application | Max. Dose/Day<br>Dose Intervals |
|---------------------------------------------------------|----------------------|--------------------------|---------------------------------|
| Pain                                                    |                      |                          |                                 |
| Dyspnea                                                 |                      |                          |                                 |
| Anxiety/Agitation                                       |                      |                          |                                 |
| Nausea/Vomiting                                         |                      |                          |                                 |
| Rales                                                   |                      |                          |                                 |
| Others: (fever, confusion, seizures, ...)               |                      |                          |                                 |
| Main attachment person (name/s, phone number, function) |                      |                          |                                 |
| Family doctor (name/s, phone number)                    |                      |                          |                                 |
| Delegate physician (name/s, phone number)               |                      |                          |                                 |

Physician's signature:

Date:

**Hospice-Hotline: 0810 969 878**

This document was developed in cooperation with representatives of the following institutions: palliative unit of the regional medical association; Tyrol Hospice Community; Social center for competence Rum; Emergency Medical Services, Department of anesthesiology and critical care, Innsbruck medical university, Palliative Medicine and Hospice Provision Tyrol, Health Fond Tyrol.

Version: September 2010

Contact: Dr. E.Medicus

E-Mail: Elisabeth.Medicus@hospiz-tirol.at

**Table S3.** Questionnaire on user satisfaction with the palliative treatment plan.

|                                                                                                            |                                                             |                                            |                                          |                                              |                                                   |
|------------------------------------------------------------------------------------------------------------|-------------------------------------------------------------|--------------------------------------------|------------------------------------------|----------------------------------------------|---------------------------------------------------|
| <b>Nursing personnel/emergency physician/family doctor</b>                                                 |                                                             |                                            |                                          |                                              |                                                   |
| Nursing home                                                                                               |                                                             |                                            |                                          |                                              |                                                   |
| Your feed-back is important and will be considered in an improved version of the palliative treatment plan |                                                             |                                            |                                          |                                              |                                                   |
| Demographic Data:                                                                                          |                                                             |                                            |                                          |                                              |                                                   |
| Gender:                                                                                                    | <input type="checkbox"/> female                             |                                            | <input type="checkbox"/> male            |                                              |                                                   |
| Age:                                                                                                       | <30 years<br><input type="checkbox"/>                       | 30–50 years<br><input type="checkbox"/>    | >50 years<br><input type="checkbox"/>    |                                              |                                                   |
| Does the palliative treatment plan contribute to patient's benefit?                                        | <input type="checkbox"/> Yes<br><input type="checkbox"/> no |                                            |                                          |                                              |                                                   |
| Is there rapid accessibility to the palliative treatment plan as needed?                                   | <input type="checkbox"/> Yes<br><input type="checkbox"/> no |                                            |                                          |                                              |                                                   |
| Where do you retain the palliative treatment plan?                                                         |                                                             |                                            |                                          |                                              |                                                   |
| Does the plan contribute to security in your treatment of patients?                                        | <input type="checkbox"/> Yes<br><input type="checkbox"/> no |                                            |                                          |                                              |                                                   |
| Does the plan influence your communication with patient and relatives?                                     | <input type="checkbox"/> Yes<br><input type="checkbox"/> no |                                            |                                          |                                              |                                                   |
| Do you feel secure in the care of patients since implementation of the plan?                               | very secure<br><input type="checkbox"/><br>1                | secure<br><input type="checkbox"/><br>2    | similar<br><input type="checkbox"/><br>3 | insecure<br><input type="checkbox"/><br>4    | very insecure<br><input type="checkbox"/><br>5    |
| Does the palliative treatment plan facilitate your work?                                                   | facilitate<br><input type="checkbox"/><br>1                 | lighten<br><input type="checkbox"/><br>2   | similar<br><input type="checkbox"/><br>3 | hinder<br><input type="checkbox"/><br>4      | complicate<br><input type="checkbox"/><br>5       |
| Are you content with the handling of the palliative treatment plan?                                        | very content<br><input type="checkbox"/><br>1               | content<br><input type="checkbox"/><br>2   | similar<br><input type="checkbox"/><br>3 | discontent<br><input type="checkbox"/><br>4  | very discontent<br><input type="checkbox"/><br>5  |
| How do you judge the efficiency of the palliative treatment plan?                                          | Very efficient<br><input type="checkbox"/><br>1             | efficient<br><input type="checkbox"/><br>2 | similar<br><input type="checkbox"/><br>3 | inefficient<br><input type="checkbox"/><br>4 | very inefficient<br><input type="checkbox"/><br>5 |

Table S3. Cont.

| Questions regarding application of the PTP                                      |                          |                          |                          |                          |                          |  |
|---------------------------------------------------------------------------------|--------------------------|--------------------------|--------------------------|--------------------------|--------------------------|--|
| Which depository for the plan is most suitable?                                 | <input type="checkbox"/> | in the health records    |                          |                          |                          |  |
|                                                                                 | <input type="checkbox"/> | at bedside               |                          |                          |                          |  |
|                                                                                 | <input type="checkbox"/> | in the nurses quarter    |                          |                          |                          |  |
|                                                                                 | <input type="checkbox"/> | others:                  |                          |                          |                          |  |
| How many patients with completed palliative treatment plan did you treat?       | 0                        | 1–2                      | 3–4                      | 5–6                      | >6                       |  |
|                                                                                 | <input type="checkbox"/> | <input type="checkbox"/> | <input type="checkbox"/> | <input type="checkbox"/> | <input type="checkbox"/> |  |
| How secure do you feel in a conversation dealing with advance care planning?    | 1                        | 2                        | 3                        | 4                        | 5                        |  |
|                                                                                 | <input type="checkbox"/> | <input type="checkbox"/> | <input type="checkbox"/> | <input type="checkbox"/> | <input type="checkbox"/> |  |
| How secure do you feel in the implementation of the palliative treatment plan?  | very secure              | secure                   | similar                  | insecure                 | very insecure            |  |
|                                                                                 | <input type="checkbox"/> | <input type="checkbox"/> | <input type="checkbox"/> | <input type="checkbox"/> | <input type="checkbox"/> |  |
| Do you require more information for working with the palliative treatment plan? | 1                        | 2                        | 3                        | 4                        | 5                        |  |
|                                                                                 | <input type="checkbox"/> | <input type="checkbox"/> | <input type="checkbox"/> | <input type="checkbox"/> | <input type="checkbox"/> |  |
| If needed, what do you request?                                                 | <input type="checkbox"/> | Yes                      |                          |                          |                          |  |
|                                                                                 | <input type="checkbox"/> | no                       |                          |                          |                          |  |
| Questions regarding application of the PTP                                      |                          |                          |                          |                          |                          |  |
| Is there need of improvement?                                                   |                          |                          |                          |                          |                          |  |
| ➤ Medical background                                                            |                          |                          |                          |                          |                          |  |
| ➤ Background of decisions                                                       |                          |                          |                          |                          |                          |  |
| ➤ Symptomatic treatment                                                         |                          |                          |                          |                          |                          |  |
| Which section of the palliative treatment plan is all right?                    |                          |                          |                          |                          |                          |  |
| Questions regarding application of the PTP                                      |                          |                          |                          |                          |                          |  |
| Is the phrasing clear?                                                          | very good                | good                     | satisfying               | bad                      | very bad                 |  |
|                                                                                 | <input type="checkbox"/> | <input type="checkbox"/> | <input type="checkbox"/> | <input type="checkbox"/> | <input type="checkbox"/> |  |
| Suggested improvement                                                           | 1                        | 2                        | 3                        | 4                        | 5                        |  |
|                                                                                 | <input type="checkbox"/> | <input type="checkbox"/> | <input type="checkbox"/> | <input type="checkbox"/> | <input type="checkbox"/> |  |
| How do you rate information content of the palliative treatment plan?           | very good                | good                     | satisfying               | bad                      | very bad                 |  |
|                                                                                 | <input type="checkbox"/> | <input type="checkbox"/> | <input type="checkbox"/> | <input type="checkbox"/> | <input type="checkbox"/> |  |
| Suggested improvement                                                           | 1                        | 2                        | 3                        | 4                        | 5                        |  |
|                                                                                 | <input type="checkbox"/> | <input type="checkbox"/> | <input type="checkbox"/> | <input type="checkbox"/> | <input type="checkbox"/> |  |
| How do you rate the arrangement of the palliative treatment plan?               | very good                | good                     | satisfying               | bad                      | very bad                 |  |
|                                                                                 | <input type="checkbox"/> | <input type="checkbox"/> | <input type="checkbox"/> | <input type="checkbox"/> | <input type="checkbox"/> |  |
| Suggested improvement                                                           | 1                        | 2                        | 3                        | 4                        | 5                        |  |
|                                                                                 | <input type="checkbox"/> | <input type="checkbox"/> | <input type="checkbox"/> | <input type="checkbox"/> | <input type="checkbox"/> |  |
| How do you rate the clarity of the palliative treatment plan?                   | very good                | good                     | satisfying               | bad                      | very bad                 |  |
|                                                                                 | <input type="checkbox"/> | <input type="checkbox"/> | <input type="checkbox"/> | <input type="checkbox"/> | <input type="checkbox"/> |  |
| Suggested improvement                                                           | 1                        | 2                        | 3                        | 4                        | 5                        |  |
|                                                                                 | <input type="checkbox"/> | <input type="checkbox"/> | <input type="checkbox"/> | <input type="checkbox"/> | <input type="checkbox"/> |  |
| Which intervals between up-dates do you recommend?                              | weekly                   | monthly                  | Half a year              | yearly                   | 3-year interval          |  |
|                                                                                 | <input type="checkbox"/> | <input type="checkbox"/> | <input type="checkbox"/> | <input type="checkbox"/> | <input type="checkbox"/> |  |
|                                                                                 | 1                        | 2                        | 3                        | 4                        | 5                        |  |
|                                                                                 | <input type="checkbox"/> | <input type="checkbox"/> | <input type="checkbox"/> | <input type="checkbox"/> | <input type="checkbox"/> |  |

**Table S3. Cont.**

| Questions regarding application of the PTP                          |                                           |
|---------------------------------------------------------------------|-------------------------------------------|
| Who is participating in advance care planning in your nursing home? | <input type="checkbox"/> Patient/Resident |
|                                                                     | <input type="checkbox"/> Physician        |
|                                                                     | <input type="checkbox"/> Nurse            |
|                                                                     | <input type="checkbox"/> Attachment nurse |
|                                                                     | <input type="checkbox"/> Charge nurse     |
|                                                                     | <input type="checkbox"/> Head of nursing  |
|                                                                     | <input type="checkbox"/> Relative         |
|                                                                     | <input type="checkbox"/> Other: ...       |
| Who should participate in advance care planning to your opinion?    |                                           |
| Thank you very much for your specifications!                        |                                           |
